# Supplementary material for: Effects of Habitual Dietary Change on the Gut Microbiota and Health of Silkworms
Source: MDPI journal article supplement (doi:10.3390/ijms25031722), 2024-01-31
Supplement: s1 [file s1]

## Supplementary Material

### Effects of Habitual Dietary Change on the Gut Microbiota and Health of Silkworms

Guang Wang <sup>1,2,†</sup>, Xueyan Ding <sup>1,2,†</sup>, Jiameng Yang <sup>1,2</sup>, Lu Ma <sup>1,2</sup>, Xiaoning Sun <sup>1,2</sup>,  
Ruihong Zhu <sup>1,2</sup>, Riming Lu <sup>1,2</sup>, Zhitian Xiao <sup>1,2</sup>, Zhiyi Xing <sup>1,2</sup>, Jingbin Liu <sup>1,2</sup>,  
Zhonghua Pan <sup>1,2</sup>, Shiqing Xu <sup>1,2</sup> and Yanghu Sima <sup>1,2,\*</sup>

<sup>1</sup> School of Biology and Basic Medical Sciences, Suzhou Medical College, Soochow University, Suzhou 215123, China; gwang1994@suda.edu.cn (G.W.); dingxueyan0120@163.com (X.D.); 20215221011@stu.suda.edu.cn (J.Y.); 20215221005@stu.suda.edu.cn (L.M.); xnsun@suda.edu.cn (X.S.); 20215221008@stu.suda.edu.cn (R.Z.); luriming1997@163.com (R.L.); 20225221012@stu.suda.edu.cn (Z.X.); 20225221013@stu.suda.edu.cn (Z.X.); 20225221003@stu.suda.edu.cn (J.L.); panzh@suda.edu.cn (Z.P.); szsqxu@suda.edu.cn (S.X.)

<sup>2</sup> Institute of Agricultural Biotechnology & Ecology (IABE), Soochow University, Suzhou 215123, China

\* Correspondence: simyh@suda.edu.cn; Tel.: +86-512-6267-0538

† These authors contributed equally to this work.

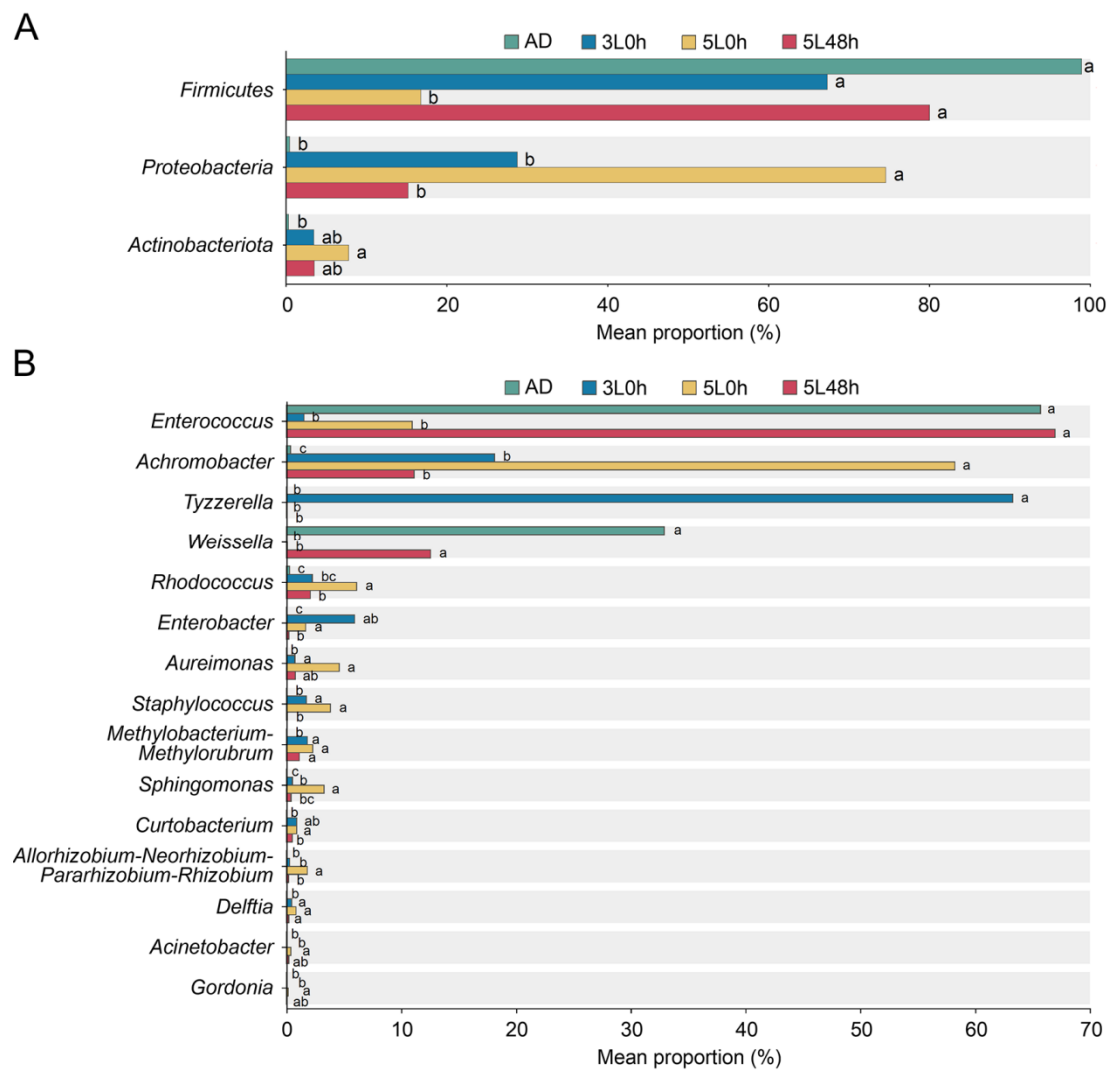

**Figure S1.** Differential analysis of microbial abundance in silkworms under different dietary patterns. (A-B) Species with abundance differences at the phylum level (A) and genus level (B) in the microbial communities of different groups. A  $P$  value  $< 0.05$  indicated significant differences between groups, as shown with different letters.

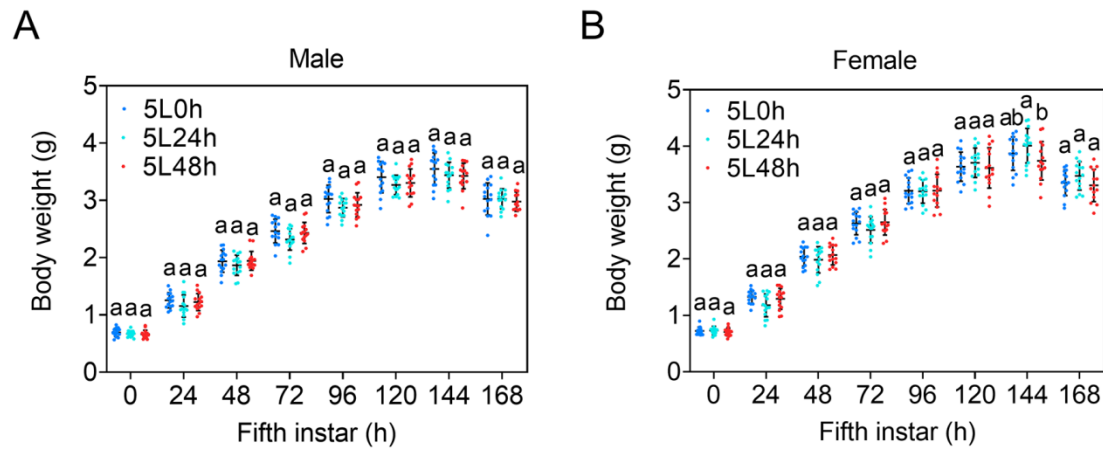

**Figure S2.** Differences in body weights of larvae with different dietary patterns. **(A-B)** Effects of different dietary transition timing during the fifth instar on the body weights of male and female larvae.  $n = 15$ . **A**, Male ( $F = 0.534$ ;  $df = 14, 333$ ;  $P = 0.913$ ). **B**, Female ( $F = 1.567$ ;  $df = 14, 335$ ;  $P = 0.087$ ). Two-way ANOVA. A  $P$  value  $< 0.05$  indicated significant differences between groups, as shown with different letters.

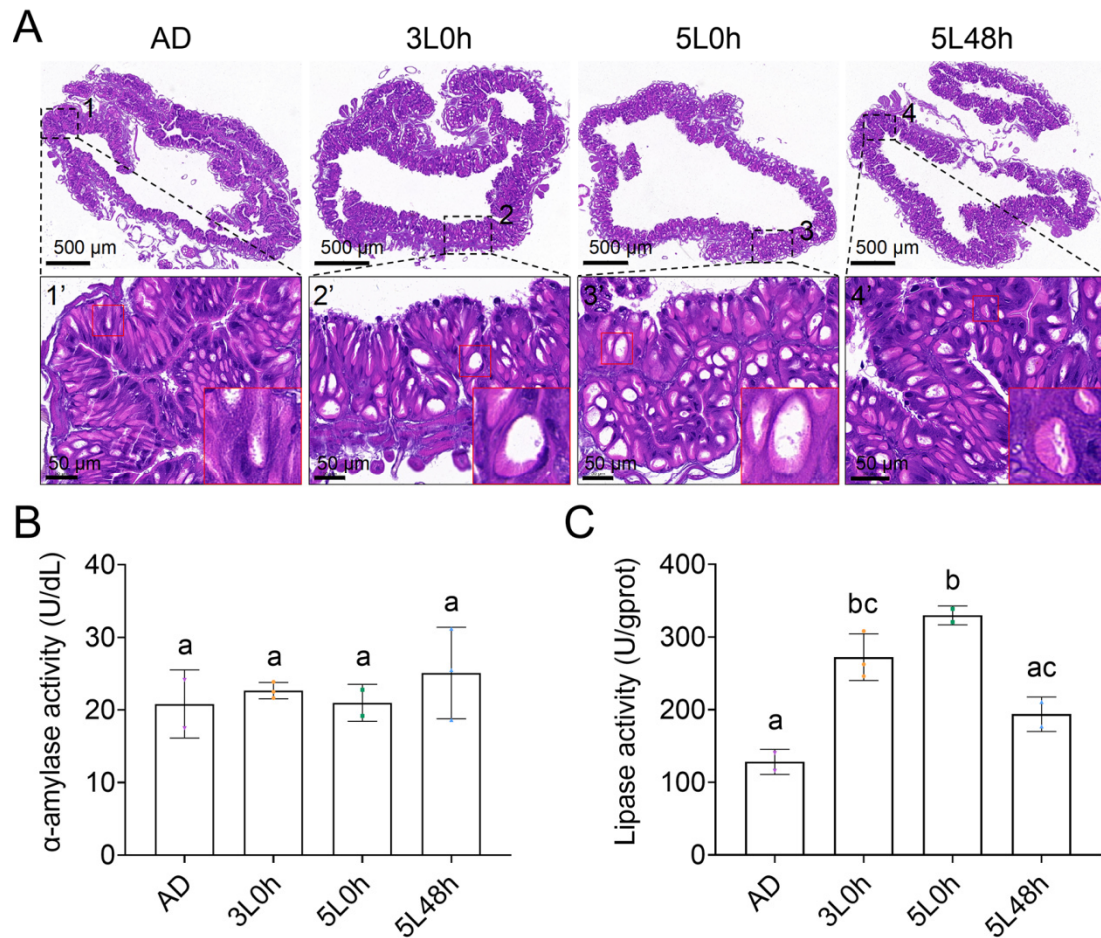

**Figure S3.** Differences in the digestion and absorption of larvae with different dietary patterns. **(A)** Hematoxylin–eosin staining image of midgut tissue sections. The midgut tissues came from silkworms at hour 72 of the fifth instar. 1, 2, 3 and 4 are partially enlarged images. **(B-C)** Digestive enzyme activity of intestinal fluid.  $n = 3$ , with ten individuals per group. **B**,  $\alpha$ -amylase ( $F = 0.547$ ;  $df = 3, 6$ ;  $P = 0.668$ ). **C**, Lipase ( $F = 25.90$ ;  $df = 3, 5$ ;  $P = 0.002$ ). Two-way ANOVA. A  $P$  value  $< 0.05$  indicated significant differences between groups, as shown with different letters.
